# Supplementary material for: Vaccination with DC-SIGN-Targeting αGC Liposomes Leads to Tumor Control, Irrespective of Suboptimally Activated T-Cells
Source: MDPI journal article supplement (doi:10.3390/pharmaceutics16050581), 2024-04-24
Supplement: s1 [file s1]

**Supplementary Table S1.** Mean size, polydispersity index, and Z potential with SD of five different batches of liposomes.

| <b>Liposome content</b>   | <b>Mean size (nm)</b> | <b>Mean PDI</b> | <b>Mean Zeta Potential (mV)</b> |
|---------------------------|-----------------------|-----------------|---------------------------------|
| <b>empty</b>              | 169,1 ± 9,2           | 0,07 ± 0,02     | -52,4 ± 6,4                     |
| <b>SLP</b>                | 166,3 ± 7,6           | 0,09 ± 0,02     | -52,6 ± 8,9                     |
| <b>SLP-Le<sup>Y</sup></b> | 160,9 ± 9,9           | 0,09 ± 0,03     | -46,1 ± 5,6                     |
| <b>SLP-αGC</b>            | 165,2 ± 3,4           | 0,07 ± 0,01     | -52,1 ± 4,7                     |
| <b>SLP-αGC-LeY</b>        | 157,1 ± 6,4           | 0,10 ± 0,03     | -41,6 ± 5,9                     |
